# Supplementary material for: Cadmium(ii) N-acetylcysteine complex formation in aqueous solution
Source: Royal Society of Chemistry journal article supplement (doi:10.1039/c1dt11705j), 2011-01-01
Supplement: c1dt11705j.pdf [file c1dt11705j.pdf]

## Electronic Supplementary Information

### Cadmium(II) *N*-Acetylcysteine Complex Formation in Aqueous Solution

Farideh Jalilehvand\*, Zahra Amini, Karnjit Parmar and Eunyoung Kang

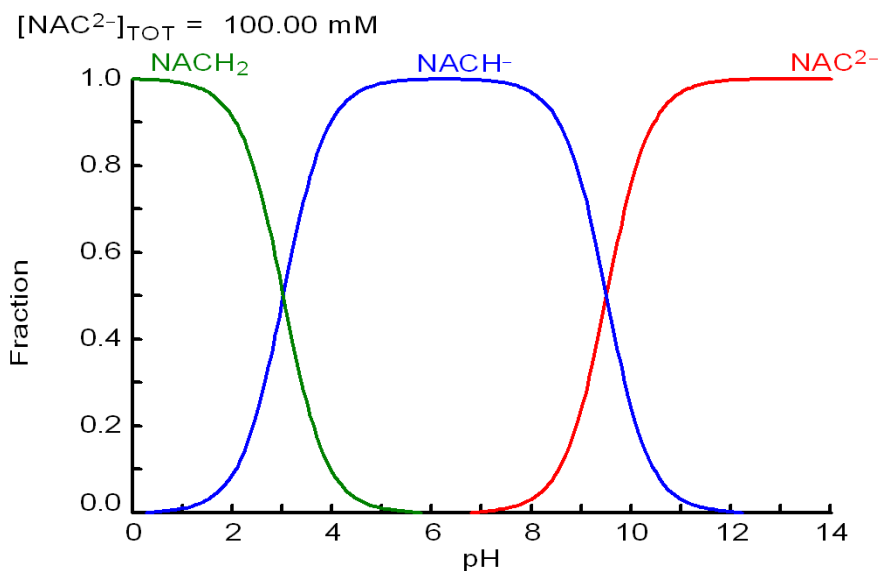

**Figure S-1.** Fraction diagram calculated with MEDUSA (<http://www.kemi.kth.se/medusa/>) to account for the distribution of the solution species vs. pH in 0.1 M *N*-acetylcysteine solution. The formation constants from *Polyhedron* 9 (1990) 831 -837 were used.

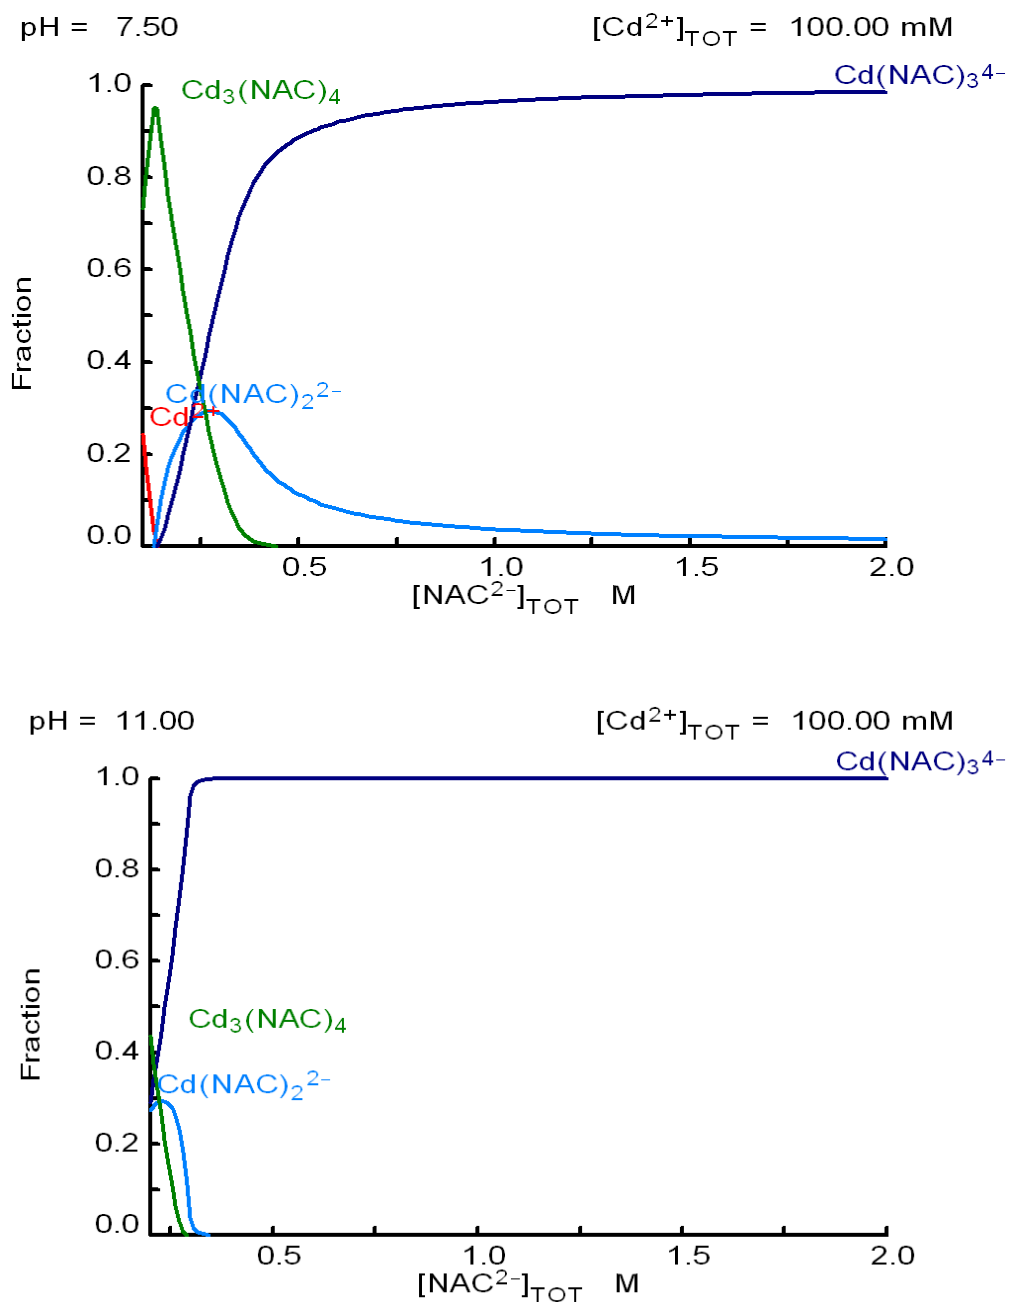

**Figure S-2.** Fraction diagrams calculated with MEDUSA (<http://www.kemi.kth.se/medusa/>) to account for the calculated distribution of Cd(II) complexes vs. total N-acetylcysteine concentration at pH 7.5 (*top*) and 11.0 (*below*) in aqueous solutions containing [Cd<sup>2+</sup>]<sub>total</sub> = 0.1 M. For generating these diagrams, the formation constants from *Polyhedron* 9 (1990) 831 -837 were used.

The full input file to the MEDUSA computer program (with  $\log\beta$  values for the equilibrium formation constants):

```
3, 13, 0, 0 /MEDUSA, t = 25 C
H+
Cd 2+
NAC 2-
NACH -      , 9.85  1 0 1
NACH2      , 13.16  2 0 1
Cd(NAC)     , 7.05  0 1 1
Cd(NAC)2 2- , 13.49  0 1 2
Cd(NAC)3 4- , 17.41  0 1 3
Cd3(NAC)4   , 35.53  0 3 4
OH-        , -14.0  -1 0 0
Cd(OH)2     , -20.35 -2 1 0
Cd(OH)3-    , -33.3  -3 1 0
Cd(OH)4 2-  , -47.35 -4 1 0
Cd2OH 3+    , -9.39  -1 2 0
Cd4(OH)4 4+ , -32.85 -4 4 0
CdOH+       , -10.08 -1 1 0
Cd 2+, H+,
LAV, -7.0 -12.0
T, 0.1
T, 2.0
T, 0.0
```

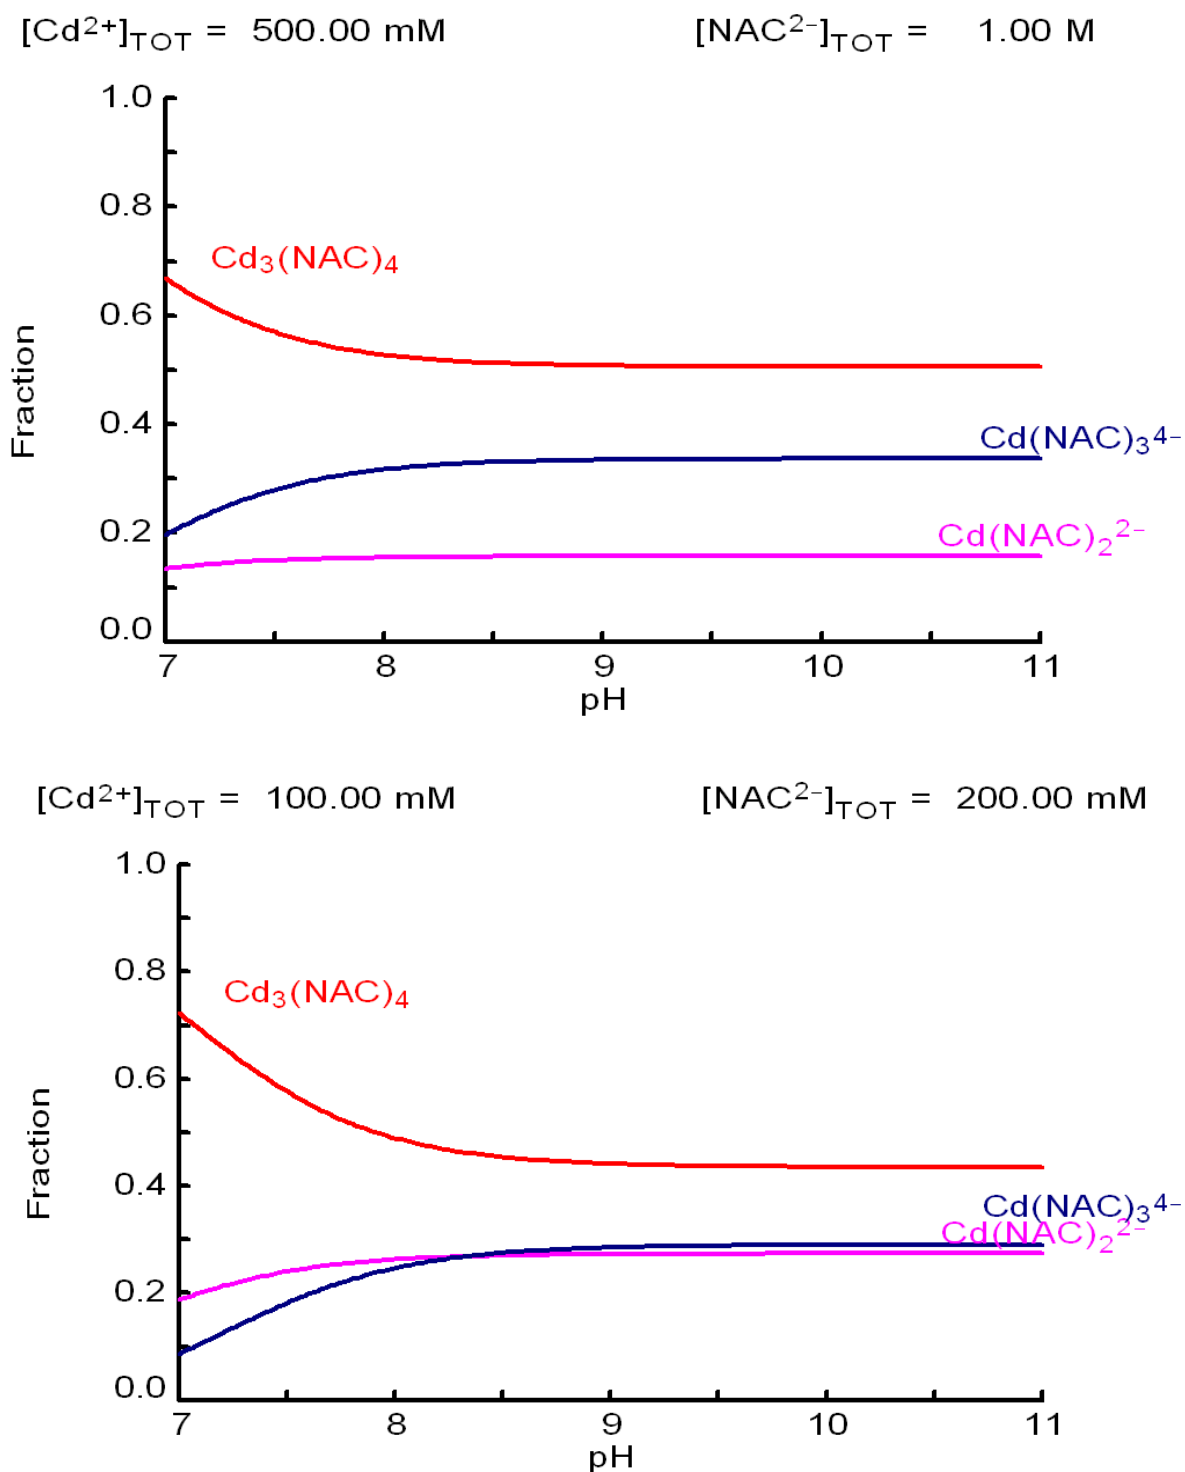

**Figure S-3.** Fraction diagrams showing the calculated distribution of Cd(II) - NAC complexes vs. pH (according to the formation constants from *Polyhedron* 9 (1990) 831 -837) in aqueous solutions with the H<sub>2</sub>NAC/ Cd(II) mole ratio 2.0: (*top*)  $c_{Cd(II)} = 0.5 \text{ M}$  (as in solutions **H1** and **H2**); (*below*)  $c_{Cd(II)} = 0.1 \text{ M}$  (as in solutions **A1** and **A2**).

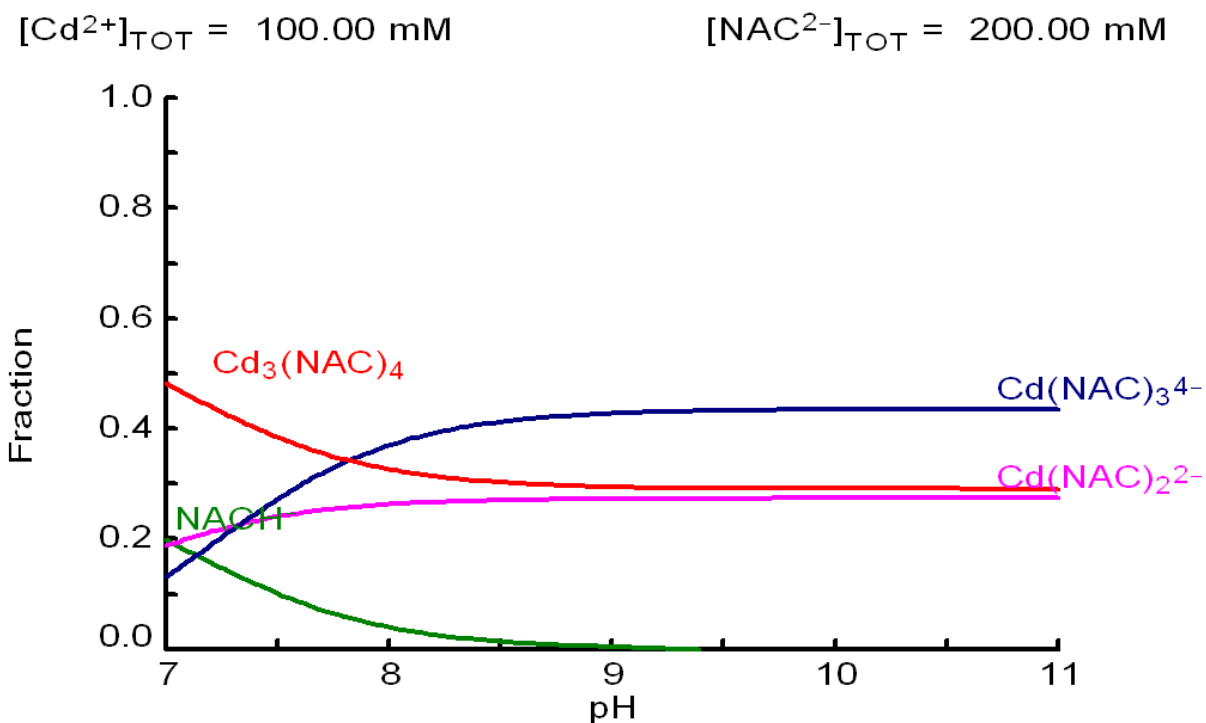

**Figure S-4.** Fraction diagram showing the calculated distribution of *N*-acetylcysteine in different species (free or as ligand in Cd-complexes) for an aqueous solution with  $c_{\text{Cd(II)}} = 0.1 \text{ M}$  and  $c_{\text{H}_2\text{NAC}} = 0.2 \text{ M}$ . Note that the diagram shows about 10% of the total *N*-acetylcysteine to be present as free  $\text{HNAC}^-$  ions at  $\text{pH} = 7.5$ , but at  $\text{pH} = 11$  the concentration of free *N*-acetylcysteine in solution is negligible.
